# Supplementary material
Source: publisher figshare collection journal article supplement (https://acs.figshare.com/ndownloader/files/4662340)
Supplement: Supplementary file 1 [file 4662340]

*Supplemental Information for:*

**Modeling the Effects of Changes in New Source Review on National SO<sub>2</sub> and NO<sub>x</sub> Emissions from  
Electricity-Generating Units**

David A. Evans,<sup>†,α</sup> Benjamin F. Hobbs,<sup>\*,‡</sup> Craig Oren,<sup>§</sup> and Karen L. Palmer<sup>†</sup>

Submitted to *Environmental Science & Technology*

\* Corresponding author: Department of Geography and Environmental Engineering, Johns Hopkins University, Baltimore, MD, 21218. Phone: (410) 516-4681; Fax: (410) 516-8996; email [bhobbs@jhu.edu](mailto:bhobbs@jhu.edu).

|                                                                                                                                                                               |    |
|-------------------------------------------------------------------------------------------------------------------------------------------------------------------------------|----|
| Description of Supporting Information.....                                                                                                                                    | S2 |
| Table S.1: IPM Model Run.....                                                                                                                                                 | S4 |
| Table S.2: Sensitivity of Cost-Effectiveness Analysis with Respect to Choice of Discount Rate,<br>without CAIR (Title IV, NO <sub>x</sub> SIP Call) .....                     | S5 |
| Table S.3: Sensitivity of Cost-Effectiveness Analysis with Respect to Choice of Discount Rate,<br>with CAIR (CAIR, Clean Air Mercury Rule and Clean Air Visibility Rule)..... | S6 |
| Table S.4: Emissions and Retrofits inside and outside of CAIR region with ERP and High R/R/R<br>Scenarios .....                                                               | S7 |

---

<sup>†</sup> Resources for the Future, Washington, D.C.

<sup>α</sup> Current address: National Center for Environmental Economics, U.S.EPA, Washington, D.C.

<sup>‡</sup> Department of Geography and Environmental Engineering, Johns Hopkins University, Baltimore, MD.

<sup>§</sup> Rutgers (The State University of New Jersey) School of Law–Camden, Camden, N.J.

## **Description of Supporting Information**

Table S.1 summarizes all of the Integrated Planning Model (IPM) runs that are described and compared in the article. The runs differ based on which New Source Review (NSR) regulation and enforcement policy is in place and the regulatory setting. The possible NSR regulations are the Equipment Replacement Provision (ERP) rule and the prerevision multifactor test. The likely effects of using ERP to determine NSR applicability are arguable very similar to the likely effects of using the hourly emissions test that was recently proposed by the Environmental Protection Agency (EPA) (7). For the prerevision rule, four possible consequences are modeled. The regulatory settings assume that either the Clean Air Interstate Rule (CAIR) and other recently adopted rules are in place, or that they not.

Tables S.2 and S.3 provides the results of the cost-effectiveness analysis. Table S.2 contains results from the model runs where CAIR is not imposed, while the results in Table S.3 reflect the presence of CAIR. The results where emissions are not discounted and where both emissions and costs are discounted at a 5% rate are referenced in the article. We also provide calculations of the control cost per ton of emissions, with SO<sub>2</sub> and NO<sub>x</sub> treated equally, for a 3% and 7% discount rate. These are the two discount rates that the EPA uses in its regulatory impact analyses.

Table S.4 provides the results of the spatial analysis that is described in the article. In the article, we compare how NO<sub>x</sub> and SO<sub>2</sub> emissions differ between high R/R/R scenario and the ERP scenario both inside and outside the CAIR region. The table also shows how the patterns of flue gas desulfurization (FGD) and Selective Catalytic Reduction (SCR) retrofits vary between the two scenarios and in the two regions. The different pattern of NO<sub>x</sub> and SO<sub>2</sub> emissions, and how these pollutants change over time in the two regions across the scenarios, is in part due to

the continued presence of the Title IV SO<sub>2</sub> cap, which is national in scope, and that no such national cap exists for NO<sub>x</sub>.

**Table S.1: IPM Model Runs**

| Regulatory Setting                                                                                                                                                                                                                                              | NSR Rule                                             | Scenario Name and Assumed Incentive Effects of NSR Rule                                                                                                                              | Notes                                                                                                                                                                                                                                                                                                  |
|-----------------------------------------------------------------------------------------------------------------------------------------------------------------------------------------------------------------------------------------------------------------|------------------------------------------------------|--------------------------------------------------------------------------------------------------------------------------------------------------------------------------------------|--------------------------------------------------------------------------------------------------------------------------------------------------------------------------------------------------------------------------------------------------------------------------------------------------------|
| <p>Without CAIR:<br/>Title IV SO<sub>2</sub> and NO<sub>x</sub> SIP Call programs only</p> <p>or</p> <p>With CAIR:<br/>Clean Air Interstate Rule, Clean Air Mercury Rule and Best Available Retrofit Technology, as well as Title IV SO<sub>2</sub> program</p> | Equipment Replacement Provision (ERP)                | “ERP”: Motivates no additional pollution control retrofits. Avoidance does not affect performance of generators.                                                                     | Assumed to generate equivalent incentives as the proposed hourly emission test for NSR applicability (7). Equivalent to EPA’s “base case” runs of the IPM model. The ERP scenarios assume that the incentives created by the NSR rule on existing sources are minor and are thus ignored in the model. |
|                                                                                                                                                                                                                                                                 | Prerevision NSR (Rules prior to promulgation of ERP) | “Avoid”:<br>NSR is avoided resulting in a 0.1%/year deterioration in efficiency (heat rate) and capacity of generators.                                                              | Follows U.S.EPA’s assumption of the incentive effects of the prerevision rule as reported in the ERP regulatory impact analysis (16). The “Avoid” scenario with CAIR is not modeled                                                                                                                    |
|                                                                                                                                                                                                                                                                 |                                                      | “Low R/R/R”:<br>Each year from 2007 to 2020, $\geq 2\%$ of the coal-fired capacity that does not have FGD or SCR as of 2006 must either retrofit these controls, repower, or retire. | All R/R/R runs assume that EGUs with the lowest retrofit cost are subject to NSR first.                                                                                                                                                                                                                |
|                                                                                                                                                                                                                                                                 |                                                      | “Middle R/R/R”:<br>Same as Low R/R/R, except percentage is 5%                                                                                                                        |                                                                                                                                                                                                                                                                                                        |
|                                                                                                                                                                                                                                                                 |                                                      | “High R/R/R”:<br>Same as Low R/R/R, except percentage is 7.5%                                                                                                                        |                                                                                                                                                                                                                                                                                                        |
|                                                                                                                                                                                                                                                                 |                                                      | “High R/R/R, Low Investment Cost”<br>Same as High R/R/R except renewable and IGCC investment costs are lower                                                                         | Sensitivity analysis exploring the effect of lower cost non-emitting technologies on results. Only analyzed with the with CAIR setting.                                                                                                                                                                |
|                                                                                                                                                                                                                                                                 |                                                      | “High R/R/R, Low Natural Gas Prices”<br>Same as High R/R/R except with natural gas prices 15% lower in 2010, falling to 25% lower in 2020                                            | Sensitivity analysis exploring the effect of lower natural gas prices. Only analyzed with the with CAIR setting.                                                                                                                                                                                       |
| Emission caps based on annual emissions from High R/R/R scenario                                                                                                                                                                                                | None                                                 |                                                                                                                                                                                      | Sensitivity analysis exploring cost savings from using cap-and-trade programs to achieve emissions realized in High R/R/R scenario. Only analyzed in the with CAIR policy setting.                                                                                                                     |

**Table S.2: Sensitivity of Cost-Effectiveness Analysis with Respect to Choice of Discount Rate, without CAIR (Title IV, NOx SIP Call)**

| Discount Rate                                   | NSR Approach        | SO <sub>2</sub> Emissions,<br>2007-2020<br>(thousands of<br>short tons) | NO <sub>x</sub> Emissions,<br>2007-2020<br>(thousands of<br>short tons) | Total<br>Discounted<br>Cost<br>(billion<br>1999 \$) | Cost<br>Effectiveness<br>(\$/ton) |
|-------------------------------------------------|---------------------|-------------------------------------------------------------------------|-------------------------------------------------------------------------|-----------------------------------------------------|-----------------------------------|
| Undiscounted<br>emissions, 5%<br>rate for costs | ERP                 | 132,430                                                                 | 51,930                                                                  | \$ 867.2                                            | ---                               |
|                                                 | “Low” R/R/R (2%)    | 132,250                                                                 | 49,140                                                                  | \$ 869.7                                            | \$ 849                            |
|                                                 | “Middle” R/R/R (5%) | 133,150                                                                 | 45,670                                                                  | \$ 882.8                                            | \$2,812                           |
|                                                 | “High” R/R/R (7.5%) | 118,670                                                                 | 41,150                                                                  | \$ 899.1                                            | \$1,301                           |
| 3% for<br>emissions and<br>costs                | ERP                 | 104,383                                                                 | 40,637                                                                  | \$1,016.1                                           | ---                               |
|                                                 | “Low” R/R/R (2%)    | 104,365                                                                 | 38,560                                                                  | \$1,019.2                                           | \$1,483                           |
|                                                 | “Middle” R/R/R (5%) | 105,317                                                                 | 36,130                                                                  | \$1,035.6                                           | \$5,446                           |
|                                                 | “High” R/R/R (7.5%) | 95,963                                                                  | 32,895                                                                  | \$1,055.9                                           | \$2,462                           |
| 5% for<br>emissions and<br>costs                | ERP                 | 90,090                                                                  | 34,910                                                                  | \$ 867.2                                            | ---                               |
|                                                 | “Low” R/R/R (2%)    | 90,140                                                                  | 33,190                                                                  | \$ 869.7                                            | \$1,503                           |
|                                                 | “Middle” R/R/R (5%) | 91,110                                                                  | 31,250                                                                  | \$ 882.8                                            | \$5,900                           |
|                                                 | “High” R/R/R (7.5%) | 84,130                                                                  | 28,640                                                                  | \$ 899.1                                            | \$2,607                           |
| 7% for<br>emissions and<br>costs                | ERP                 | 78,414                                                                  | 30,249                                                                  | \$ 746.7                                            | ---                               |
|                                                 | “Low” R/R/R (2%)    | 78,516                                                                  | 28,805                                                                  | \$ 748.7                                            | \$1,530                           |
|                                                 | “Middle” R/R/R (5%) | 79,492                                                                  | 27,255                                                                  | \$ 759.2                                            | \$6,542                           |
|                                                 | “High” R/R/R (7.5%) | 74,287                                                                  | 25,125                                                                  | \$ 772.4                                            | \$2,787                           |

**Table S.3: Sensitivity of Cost-Effectiveness Analysis with Respect to Choice of Discount Rate, with CAIR (CAIR, Clean Air Mercury Rule and Clean Air Visibility Rule)**

| Discount Rate                                   | NSR Approach        | SO <sub>2</sub> Emissions,<br>2007-2020<br>(thousands of<br>short tons) | NO <sub>x</sub> Emissions,<br>2007-2020<br>(thousands of<br>short tons) | Total<br>Discounted<br>Cost<br>(billion<br>1999 \$) | Cost Effectiveness<br>(\$/ton)  |
|-------------------------------------------------|---------------------|-------------------------------------------------------------------------|-------------------------------------------------------------------------|-----------------------------------------------------|---------------------------------|
| Undiscounted<br>emissions, 5%<br>rate for costs | ERP                 | 79,520                                                                  | 32,960                                                                  | \$ 900.9                                            |                                 |
|                                                 | “Low” R/R/R (2%)    | 79,530                                                                  | 32,960                                                                  | \$ 900.9                                            | Costs and<br>emissions increase |
|                                                 | “Middle” R/R/R (5%) | 79,910                                                                  | 32,250                                                                  | \$ 901.8                                            | \$ 2,900                        |
|                                                 | “High” R/R/R (7.5%) | 79,280                                                                  | 30,200                                                                  | \$ 910.1                                            | \$ 3,100                        |
| 3% for<br>emissions and<br>costs                | ERP                 | 63,780                                                                  | 26,386                                                                  | \$1,056.5                                           |                                 |
|                                                 | “Low” R/R/R (2%)    | 63,784                                                                  | 26,386                                                                  | \$1,056.6                                           | Costs and<br>emissions increase |
|                                                 | “Middle” R/R/R (5%) | 64,139                                                                  | 25,918                                                                  | \$1,057.8                                           | \$11,705                        |
|                                                 | “High” R/R/R (7.5%) | 64,268                                                                  | 24,491                                                                  | \$1,068.6                                           | \$ 8,580                        |
| 5% for<br>emissions and<br>costs                | ERP                 | 55,670                                                                  | 23,010                                                                  | \$ 900.9                                            |                                 |
|                                                 | “Low” R/R/R (2%)    | 55,670                                                                  | 23,010                                                                  | \$ 900.9                                            | Costs and<br>emissions increase |
|                                                 | “Middle” R/R/R (5%) | 56,000                                                                  | 22,650                                                                  | \$ 901.8                                            | \$53,000                        |
|                                                 | “High” R/R/R (7.5%) | 56,450                                                                  | 21,530                                                                  | \$ 910.1                                            | \$13,000                        |
| 7% for<br>emissions and<br>costs                | ERP                 | 48,975                                                                  | 20,235                                                                  | \$ 774.9                                            |                                 |
|                                                 | “Low” R/R/R (2%)    | 48,979                                                                  | 20,235                                                                  | \$ 775.0                                            | Costs and<br>emissions increase |
|                                                 | “Middle” R/R/R (5%) | 49,294                                                                  | 19,961                                                                  | \$ 775.6                                            | Costs and<br>emissions increase |
|                                                 | “High” R/R/R (7.5%) | 49,964                                                                  | 19,065                                                                  | \$ 782.0                                            | \$38,907                        |

**Table S.4: Emissions and Retrofits inside and outside of CAIR region with ERP and High**

**R/R/R Scenarios**

|                                                                  |                 | <b>2007</b> | <b>2010</b> | <b>2015</b> | <b>2020</b> |
|------------------------------------------------------------------|-----------------|-------------|-------------|-------------|-------------|
| <b>SO<sub>2</sub> emissions (million short tons)<sup>†</sup></b> |                 |             |             |             |             |
| ERP                                                              | CAIR region     | 7003        | 5140        | 4075        | 3370        |
|                                                                  | non-CAIR region | <u>869</u>  | <u>906</u>  | <u>652</u>  | <u>602</u>  |
|                                                                  | <i>Total</i>    | 7872        | 6046        | 4727        | 3972        |
| High R/R/R scenario                                              | CAIR region     | 7573        | 5759        | 3827        | 2665        |
|                                                                  | non-CAIR region | <u>884</u>  | <u>910</u>  | <u>651</u>  | <u>507</u>  |
|                                                                  | <i>Total</i>    | 8457        | 6669        | 4478        | 3172        |
| <b>NO<sub>x</sub> emissions (million short tons)<sup>†</sup></b> |                 |             |             |             |             |
| ERP                                                              | CAIR region     | 2608        | 1407        | 1154        | 1120        |
|                                                                  | non-CAIR region | <u>793</u>  | <u>807</u>  | <u>605</u>  | <u>605</u>  |
|                                                                  | <i>Total</i>    | 3401        | 2214        | 1759        | 1725        |
| High R/R/R scenario                                              | CAIR region     | 2625        | 1409        | 1152        | 851         |
|                                                                  | non-CAIR region | <u>795</u>  | <u>807</u>  | <u>462</u>  | <u>183</u>  |
|                                                                  | <i>Total</i>    | 3420        | 2216        | 1614        | 1034        |
| <b>Percentage of coal capacity with FGD<sup>‡</sup></b>          |                 |             |             |             |             |
| ERP                                                              | CAIR region     | 27%         | 45%         | 57%         | 64%         |
|                                                                  | non-CAIR region | 59%         | 63%         | 85%         | 88%         |
| High R/R/R scenario                                              | CAIR region     | 27%         | 42%         | 66%         | 93%         |
|                                                                  | non-CAIR region | 59%         | 63%         | 86%         | 96%         |
| <b>Percentage of coal capacity with SCR<sup>‡</sup></b>          |                 |             |             |             |             |
| ERP                                                              | CAIR region     | 34%         | 50%         | 62%         | 63%         |
|                                                                  | non-CAIR region | 2%          | 3%          | 7%          | 7%          |
| High R/R/R scenario                                              | CAIR region     | 34%         | 51%         | 71%         | 88%         |
|                                                                  | non-CAIR region | 2%          | 3%          | 40%         | 92%         |

<sup>†</sup>Emissions are from coal-fired electricity generation units above 25 megawatts.

<sup>‡</sup>Total coal capacity in each region does not vary significantly across the scenarios.
